# Supplementary material for: Short-Term Exposure to PM2.5 and O3 Impairs Liver Function in HIV/AIDS Patients: Evidence from a Repeated Measurements Study
Source: MDPI journal article supplement (doi:10.3390/toxics11090729), 2023-08-25
Supplement: s1 [file s1]

---

# Short-Term Exposure to PM<sub>2.5</sub> and O<sub>3</sub> Impairs Liver Function in HIV/AIDS Patients: Evidence From a Repeated Measurements Study

## Table of Contents

**Figure S1** The flow chart of participant recruitment and follow-up visits.

**Table S1** Associations of short-term exposure to PM<sub>2.5</sub> with percent change in hepatic enzymes per 10µg/m<sup>3</sup> of exposure concentration in PWHA with no disease history.

**Table S2** Associations of short-term exposure to O<sub>3</sub> with percent change in hepatic enzymes per 10µg/m<sup>3</sup> of exposure concentration in PWHA with no disease history.

**Table S3** Associations of short-term exposure to PM<sub>2.5</sub> with percent change in hepatic enzymes per 10µg/m<sup>3</sup> of exposure concentration in PWHA without alcohol consumption.

**Table S4** Associations of short-term exposure to O<sub>3</sub> with percent change in hepatic enzymes per 10µg/m<sup>3</sup> of exposure concentration in PWHA without alcohol consumption.

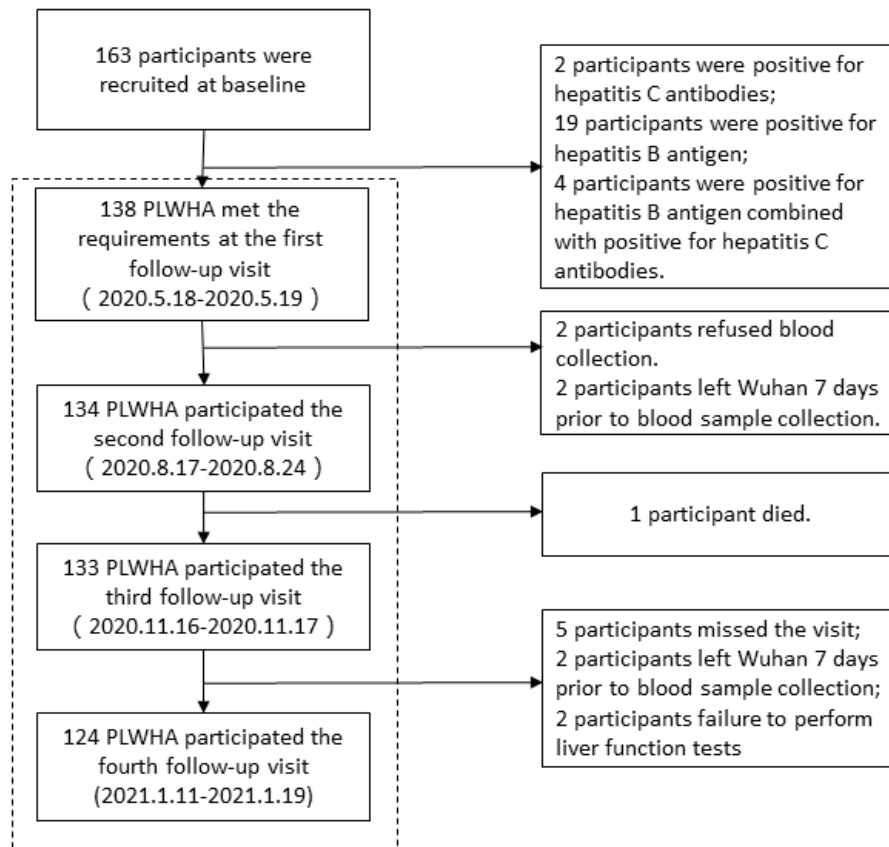

**Figure S1.** The flow chart of participant recruitment and follow-up visits.

**Table S1.** Associations of short-term exposure to PM<sub>2.5</sub> with percent change in hepatic enzymes per 10µg/m<sup>3</sup> of exposure concentration in PWHA with no disease history.

| Exposure | % Changes in ALT, U/L | % Changes in AST, U/L | % Changes in ALP U/L  | % Changes in γ-GGT, U/L |
|----------|-----------------------|-----------------------|-----------------------|-------------------------|
|          | β (95%CI)             | β (95%CI)             | β (95%CI)             | β (95%CI)               |
| lag0     | 2.53 (-1.76 to 7.03)  | 8.93 (5.92 to 11.83)  | 0.03 (-1.22 to 1.32)  | 0.64 (-2.25 to 3.59)    |
| lag1     | 0.51 (-3.62 to 4.81)  | 4.26 (1.58 to 6.82)   | -0.49 (-1.70 to 0.73) | 0.09 (-2.71 to 2.94)    |
| lag2     | 1.45 (-1.38 to 4.33)  | 7.26 (4.40 to 9.07)   | -0.63 (-1.43 to 0.18) | 0.15 (-1.75 to 2.02)    |
| lag3     | 1.43 (-1.36 to 4.18)  | 5.12 (3.22 to 6.85)   | -0.19 (-0.98 to 0.61) | -0.14 (-1.98 to 1.71)   |
| lag4     | 0.77 (-1.92 to 3.54)  | 4.35 (2.73 to 5.99)   | -0.37 (-1.18 to 0.45) | -0.10 (-2.00 to 1.77)   |
| lag5     | 1.75 (-0.97 to 4.50)  | 0.69 (-1.06 to 2.32)  | 0.65 (-0.16 to 1.04)  | 0.98 (-0.89 to 2.85)    |
| lag6     | 2.56 (-2.89 to 8.59)  | 6.37 (2.51 to 10.37)  | -0.14 (-0.15 to 1.48) | 2.43 (-1.33 to 6.32)    |
| lag01    | 1.34 (-3.46 to 6.37)  | 6.64 (3.43 to 9.73)   | 0.14 (-1.27 to 1.58)  | 0.74 (-2.53 to 4.10)    |
| lag02    | 1.49 (-3.24 to 6.42)  | 8.70 (5.59 to 11.68)  | -0.23 (-1.60 to 1.17) | 0.79 (-2.43 to 4.05)    |
| lag03    | 1.58 (-3.16 to 6.45)  | 8.56 (5.44 to 11.45)  | -0.15 (-1.53 to 1.25) | 0.78 (-2.45 to 4.04)    |
| lag04    | 0.94 (-3.43 to 5.44)  | 7.62 (4.77 to 10.23)  | -0.36 (-1.65 to 0.94) | 0.33 (-2.69 to 3.36)    |
| lag05    | 2.20 (-3.28 to 7.87)  | 9.08 (5.43 to 12.38)  | 0.23 (-1.39 to 1.88)  | 1.29 (-2.53 to 5.12)    |
| lag06    | 2.66 (-3.38 to 8.97)  | 10.08 (6.03 to 13.80) | 0.30 (-1.49 to 2.13)  | 1.97 (-2.26 to 6.23)    |

Note: All analyses were adjusted for sex, age, BMI, education, occupation, marital status, annual income, smoking history, alcohol consumption, and temperature. HIV, human immunodeficiency virus; PM<sub>2.5</sub>, particulate matter with an aerodynamic diameter of ≤2.5 µm; PWHA, people living with HIV/AIDS; CI, confidence interval; ALT, alanine aminotransferase; AST, aspartate aminotransferase; ALP, alkaline phosphatase; γ-GGT, gamma-glutamyl transferase.

**Table S2.** Associations of short-term exposure to O<sub>3</sub> with percent change in hepatic enzymes per 10µg/m<sup>3</sup> of exposure concentration in PWHA with no disease history.

| Exposure                            | % Changes in ALT, U/L | % Changes in AST, U/L  | % Changes in ALP U/L  | % Changes in γ-GGT, U/L |
|-------------------------------------|-----------------------|------------------------|-----------------------|-------------------------|
|                                     | β (95%CI)             | β (95%CI)              | β (95%CI)             | β (95%CI)               |
| O <sub>3</sub> (µg/m <sup>3</sup> ) |                       |                        |                       |                         |
| lag0                                | 7.67 (0.26 to 15.94)  | 20.74 (15.57 to 26.44) | -0.46(-2.54 to -1.68) | 2.70 (-2.20 to 7.80)    |
| lag1                                | 3.37 (-3.60 to 10.94) | 1.99 (-2.22 to 6.54)   | 1.66 (-0.39 to 3.76)  | 1.45 (-3.18 to 6.43)    |

|       |                       |                         |                       |                       |
|-------|-----------------------|-------------------------|-----------------------|-----------------------|
| lag2  | 1.04 (-4.24 to 6.89)  | -8.18 (-11.07 to -4.68) | 0.94 (-0.69 to 2.63)  | -0.69 (-4.31 to 3.19) |
| lag3  | 1.76 (-3.44 to 7.99)  | 3.61 (0.04 to 7.31)     | 0.78 (-0.73 to 2.34)  | 2.55 (-0.98 to 6.26)  |
| lag4  | 2.48 (-0.28 to 5.25)  | 8.92 (7.38 to 10.47)    | -0.73 (-1.51 to 0.04) | 0.42 (-1.41 to 2.21)  |
| lag5  | 2.89 (-1.83 to 7.74)  | 6.46 (3.37 to 9.50)     | 0.10 (-1.25 to 1.46)  | 1.07 (-2.07 to 4.24)  |
| lag6  | 3.46 (-0.58 to 7.61)  | 12.34 (9.63 to 15.01)   | -0.94 (-2.06 to 0.19) | 0.26 (-2.39 to 2.92)  |
| lag01 | 6.84 (-1.62 to 16.26) | 16.39 (10.78 to 22.52)  | 1.11 (-1.32 to 3.61)  | 3.02 (-2.61 to 9.00)  |
| lag02 | 5.88 (-2.89 to 15.86) | 4.33 (-0.93 to 10.37)   | 1.86 (-0.76 to 4.58)  | 1.55 (-4.36 to 7.97)  |
| lag03 | 6.40 (-2.41 to 16.35) | 6.75 (1.31 to 12.75)    | 1.88 (-0.71 to 4.58)  | 2.99 (-2.96 to 9.45)  |
| lag04 | 6.13 (-1.58 to 14.58) | 15.42 (10.49 to 20.68)  | 0.59 (-1.61 to 2.85)  | 2.54 (-2.59 to 7.95)  |
| lag05 | 6.54 (-1.27 to 15.07) | 17.65 (12.60 to 23.02)  | 0.49 (-1.71 to 2.76)  | 2.59 (-2.58 to 7.99)  |
| lag06 | 6.21 (-1.14 to 14.16) | 18.41 (13.64 to 23.41)  | 0.07 (-1.99 to 2.18)  | 2.06 (-2.78 to 7.08)  |

Note: All analyses were adjusted for sex, age, BMI, education, occupation, marital status, annual income, smoking history, alcohol consumption, and temperature. HIV, human immunodeficiency virus; O<sub>3</sub>, ozone; PWHA, people living with HIV/AIDS; CI, confidence interval; ALT, alanine aminotransferase; AST, aspartate aminotransferase; ALP, alkaline phosphatase;  $\gamma$ -GGT, gamma-glutamyl transferase.

**Table S3.** Associations of short-term exposure to PM<sub>2.5</sub> with percent change in hepatic enzymes per 10 $\mu$ g/m<sup>3</sup> of exposure concentration in PWHA without alcohol consumption.

| Exposure                                     | % Changes in ALT, U/L | % Changes in AST, U/L | % Changes in ALP U/L   | % Changes in $\gamma$ -GGT, U/L |
|----------------------------------------------|-----------------------|-----------------------|------------------------|---------------------------------|
|                                              | $\beta$ (95%CI)       | $\beta$ (95%CI)       | $\beta$ (95%CI)        | $\beta$ (95%CI)                 |
| PM <sub>2.5</sub> ( $\mu$ g/m <sup>3</sup> ) |                       |                       |                        |                                 |
| lag0                                         | 0.25 (-3.21 to 3.88)  | 5.76 (3.44 to 8.13)   | 0.44 (-0.70 to 1.65)   | -0.10 (-2.31 to 2.16)           |
| lag1                                         | -1.51 (-4.93 to 2.10) | 3.29 (1.10 to 5.59)   | -0.95 (-2.07 to 0.23)  | -1.84 (-4.02 to 0.37)           |
| lag2                                         | 0.13 (-2.45 to 2.81)  | 6.53 (4.86 to 8.29)   | -0.93 (-1.76 to -0.06) | -0.27 (-1.92 to 1.39)           |
| lag3                                         | 0.06 (-2.67 to 2.90)  | 2.89 (1.12 to 4.76)   | -0.82 (-1.71 to 0.10)  | -0.73 (-2.46 to 1.05)           |
| lag4                                         | 0.52 (-1.78 to 2.99)  | 2.82 (1.43 to 4.32)   | -0.25 (-1.03 to 0.55)  | 0.06 (-1.46 to 1.61)            |
| lag5                                         | 1.40 (-0.72 to 3.55)  | 1.20 (-0.22 to 2.57)  | 0.37 (-0.32 to 1.06)   | 0.50 (-0.82 to 1.82)            |
| lag6                                         | 2.88 (-2.35 to 8.65)  | 6.34 (2.74 to 10.23)  | 0.65 (-1.03 to 2.48)   | -0.59 (-3.85 to 2.81)           |
| lag01                                        | -1.22 (-5.11 to 2.90) | 4.49 (1.93 to 7.14)   | 0.05 (-1.25 to 1.43)   | -0.96 (-3.48 to 1.62)           |
| lag02                                        | -0.88 (-4.85 to 3.32) | 6.34 (3.76 to 9.01)   | -0.42 (-1.74 to 0.97)  | -0.67 (-3.25 to 1.96)           |
| lag03                                        | -0.77 (-5.02 to 3.76) | 6.32 (3.58 to 9.17)   | -0.79 (-2.20 to 0.71)  | -0.87 (-3.65 to 1.97)           |

|       |                       |                      |                       |                       |
|-------|-----------------------|----------------------|-----------------------|-----------------------|
| lag04 | -0.93 (-4.91 to 3.78) | 5.58 (3.05 to 8.24)  | -0.89 (-2.23 to 0.53) | -0.83 (-3.46 to 1.87) |
| lag05 | 0.19 (-4.63 to 5.39)  | 6.82 (3.71 to 10.01) | -0.34 (-1.95 to 1.38) | -0.18 (-3.36 to 3.09) |
| lag06 | 0.65 (-4.47 to 6.20)  | 7.61 (4.26 to 11.05) | -0.13 (-1.84 to 1.70) | -0.14 (-3.50 to 3.33) |

Note: All analyses were adjusted for sex, age, BMI, education, occupation, marital status, annual income, smoking history, disease history, and temperature. HIV, human immunodeficiency virus; PM<sub>2.5</sub>, particulate matter with an aerodynamic diameter of  $\leq 2.5$   $\mu\text{m}$ ; PWH, people living with HIV/AIDS; CI, confidence interval; ALT, alanine aminotransferase; AST, aspartate aminotransferase; ALP, alkaline phosphatase;  $\gamma$ -GGT, gamma-glutamyl transferase.

**Table S4.** Associations of short-term exposure to O<sub>3</sub> with percent change in hepatic enzymes per 10 $\mu\text{g}/\text{m}^3$  of exposure concentration in PWH without alcohol consumption.

| Exposure                                    | % Changes in ALT, U/L | % Changes in AST, U/L  | % Changes in ALP U/L   | % Changes in $\gamma$ -GGT, U/L |
|---------------------------------------------|-----------------------|------------------------|------------------------|---------------------------------|
|                                             | $\beta$ (95%CI)       | $\beta$ (95%CI)        | $\beta$ (95%CI)        | $\beta$ (95%CI)                 |
| O <sub>3</sub> ( $\mu\text{g}/\text{m}^3$ ) |                       |                        |                        |                                 |
| lag0                                        | 8.12 (1.71 to 15.11)  | 19.59 (15.38 to 24.20) | 0.41 (-1.16 to 2.46)   | 2.96 (-0.93 to 7.07)            |
| lag1                                        | 5.41 (-1.10 to 12.36) | 3.06 (-0.95 to 7.30)   | 1.69 (-0.02 to 3.80)   | 3.44 (-0.55 to 7.63)            |
| lag2                                        | 2.93 (-1.83 to 8.15)  | -9.53 (-12.4 to -6.67) | 0.74 (-0.00 to 2.38)   | 0.83 (-2.15 to 4.00)            |
| lag3                                        | 2.76 (-2.17 to 7.76)  | 8.90 (5.595 to 12.20)  | 0.17 (-0.01 to 1.77)   | 1.00 (-2.03 to 4.09)            |
| lag4                                        | 2.07 (-0.58 to 4.77)  | 8.65 (7.164 to 10.14)  | -0.94 (-0.05 to -0.09) | 0.32 (-1.33 to 1.99)            |
| lag5                                        | 2.69 (-1.12 to 6.81)  | 5.72 (3.17 to 8.37)    | -0.64 (-1.10 to 0.62)  | 1.48 (-0.92 to 3.96)            |
| lag6                                        | 4.51 (0.51 to 8.78)   | 12.48 (9.809 to 15.17) | -1.20 (-2.24 to 0.07)  | 0.80 (-1.64 to 3.35)            |
| lag01                                       | 8.43 (0.71 to 16.89)  | 17.62 (12.62 to 23.16) | 1.78 (-1.14 to 4.26)   | 4.63 (-0.11 to 9.65)            |
| lag02                                       | 8.48 (0.25 to 17.77)  | 4.41 (-0.59 to 10.03)  | 2.28 (-0.09 to 5.01)   | 4.28 (-0.78 to 9.75)            |
| lag03                                       | 8.82 (0.34 to 18.17)  | 10.42 (5.126 to 16.24) | 1.94 (-0.07 to 4.71)   | 4.10 (-1.07 to 9.63)            |
| lag04                                       | 6.62 (-0.67 to 14.50) | 18.45 (13.83 to 23.42) | 0.46 (-0.05 to 2.83)   | 3.04 (-1.45 to 7.78)            |
| lag05                                       | 6.38 (-0.79 to 14.20) | 18.70 (14.01 to 23.70) | 0.10 (-1.13 to 2.44)   | 3.26 (-1.19 to 7.95)            |
| lag06                                       | 6.28 (-0.56 to 13.74) | 18.67 (14.29 to 23.41) | -0.25 (-1.16 to 1.97)  | 2.81 (-1.42 to 7.27)            |

Note: All analyses were adjusted for sex, age, BMI, education, occupation, marital status, annual income, smoking history, disease history, and temperature. HIV, human immunodeficiency virus; O<sub>3</sub>, ozone; PWH, people living with HIV/AIDS; CI, confidence interval; ALT, alanine aminotransferase; AST, aspartate aminotransferase; ALP, alkaline phosphatase;  $\gamma$ -GGT, gamma-glutamyl transferase.
